# Supplementary material for: Exploring the 2′-Hydroxy-Chalcone Framework for the Development of Dual Antioxidant and Soybean Lipoxygenase Inhibitory Agents
Source: MDPI journal article supplement (doi:10.3390/molecules26092777), 2021-05-08

# Exploring the 2'-hydroxy-chalcone framework for the development of dual antioxidant and soybean lipoxygenase inhibitory agents

Ioanna Kostopoulou<sup>1</sup>, Andromachi Tzani<sup>1</sup>, Nestor Ioannis Polyzos<sup>1</sup>, Maria-Anna Karadendrou<sup>1</sup>, Eftichia Kritsi<sup>2,4</sup>, Eleni Pontiki<sup>3</sup>, Thalia Liargkova<sup>3</sup>, Dimitra Hadjipavlou-Litina<sup>3</sup>, Panagiotis Zoumpoulakis<sup>2,4</sup>, Anastasia Detsi<sup>1\*</sup>

<sup>1</sup> Department of Chemical Sciences, Laboratory of Organic Chemistry, School of Chemical Engineering, National Technical University of Athens, Heroon Polytechniou 9, Zografou Campus, 15780 Athens, Greece; ioanna.th.kostopoulou@gmail.com (I.K.); andromachi.tzani@gmail.com (A.T.); nestor\_polyzos@hotmail.com (N.I.P.); markarad96@gmail.com (M.A.K.)

<sup>2</sup> Institute of Chemical Biology, National Hellenic Research Foundation, 48, Vas. Constantinou Avenue, 11635 Athens, Greece; ekritsi@eie.gr (E.K.)

<sup>3</sup> Laboratory of Pharmaceutical Chemistry, School of Pharmacy, Faculty of Health Sciences, Aristotle University of Thessaloniki, Thessaloniki 54124, Greece; epontiki@pharm.auth.gr (E.P.); thalialiargkova@yahoo.gr (T.L.); hadjipav@pharm.auth.gr (D.H.-L.)

<sup>4</sup> Department of Food Science and Technology, University of West Attica, Ag. Spyridonos, 12243 Egaleo, Greece; pzoump@uniwa.gr (P.Z.)

\* Correspondence: adetsi@chemeng.ntua.gr; Tel.: +30-210-7724126

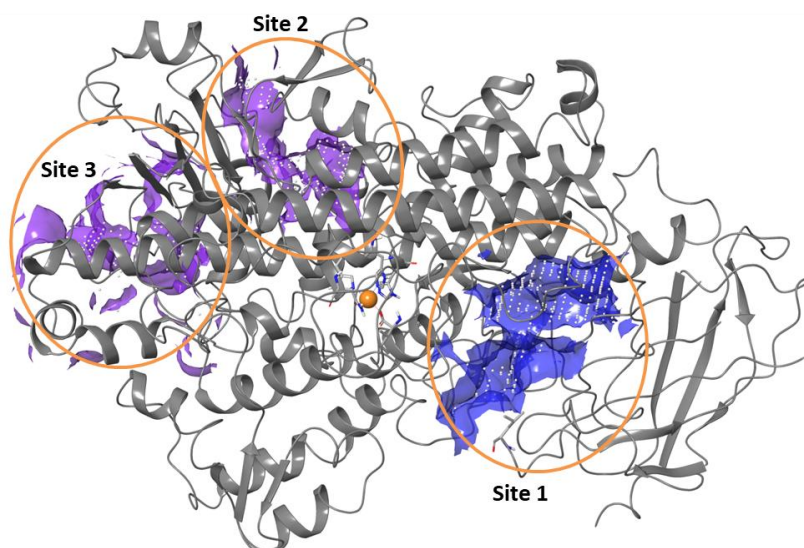

**Figure S1:** Predicted binding sites of Soybean Lipoxxygenase seed isoform 1 (LOX-1).

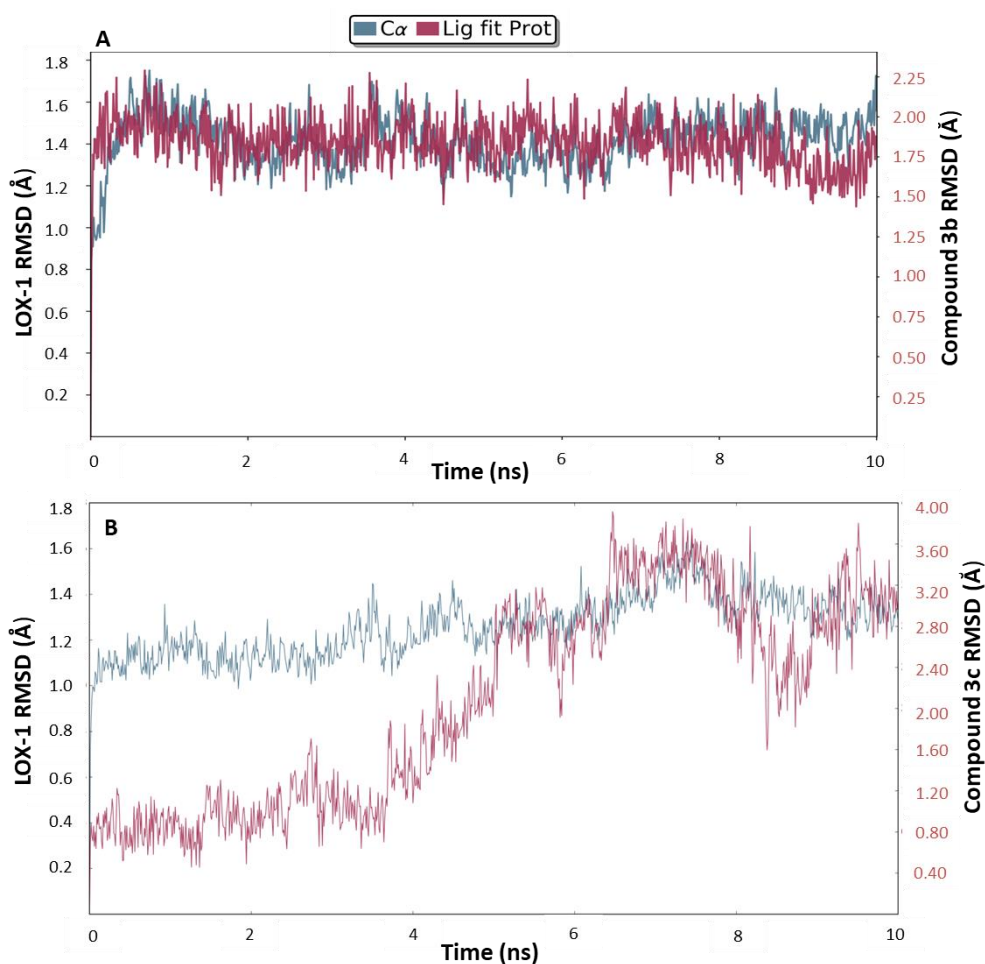

**Figure S2:** RMSD calculations for (A) all Ca enzyme atoms (blue) in LOX-1-Compound **3b** complex and for all atoms of compound **3b** (red), (B) ) all C<sub>a</sub> enzyme atoms (blue) in LOX-1-Compound **3c** complex and for all atoms of compound **3c** (red).

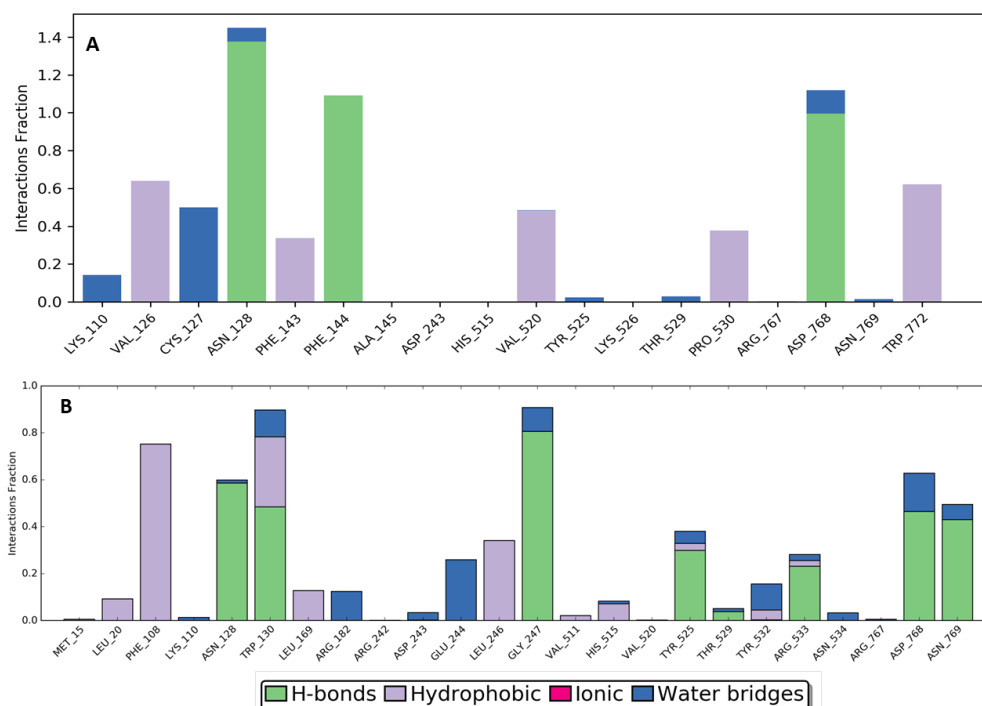

**Figure S3:** Categorization of (A) LOX-1-Compound **3b** and (B) LOX-1-Compound **3c** interactions, during the molecular dynamics simulation (10 ns).

# **<sup>1</sup>H NMR spectra of all the synthesized compounds and <sup>13</sup>C NMR spectra of the novel synthesized compounds**

## **<sup>1</sup>H NMR of compound 3a**

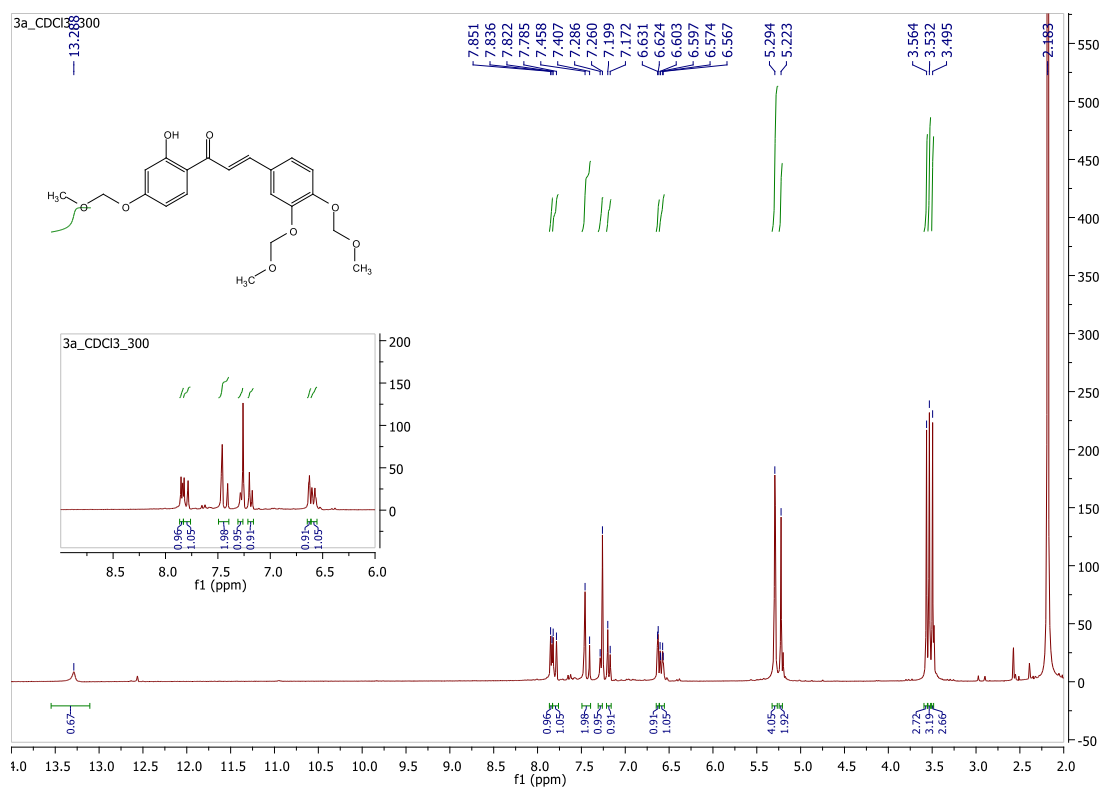

## **<sup>1</sup>H NMR of compound 3b**

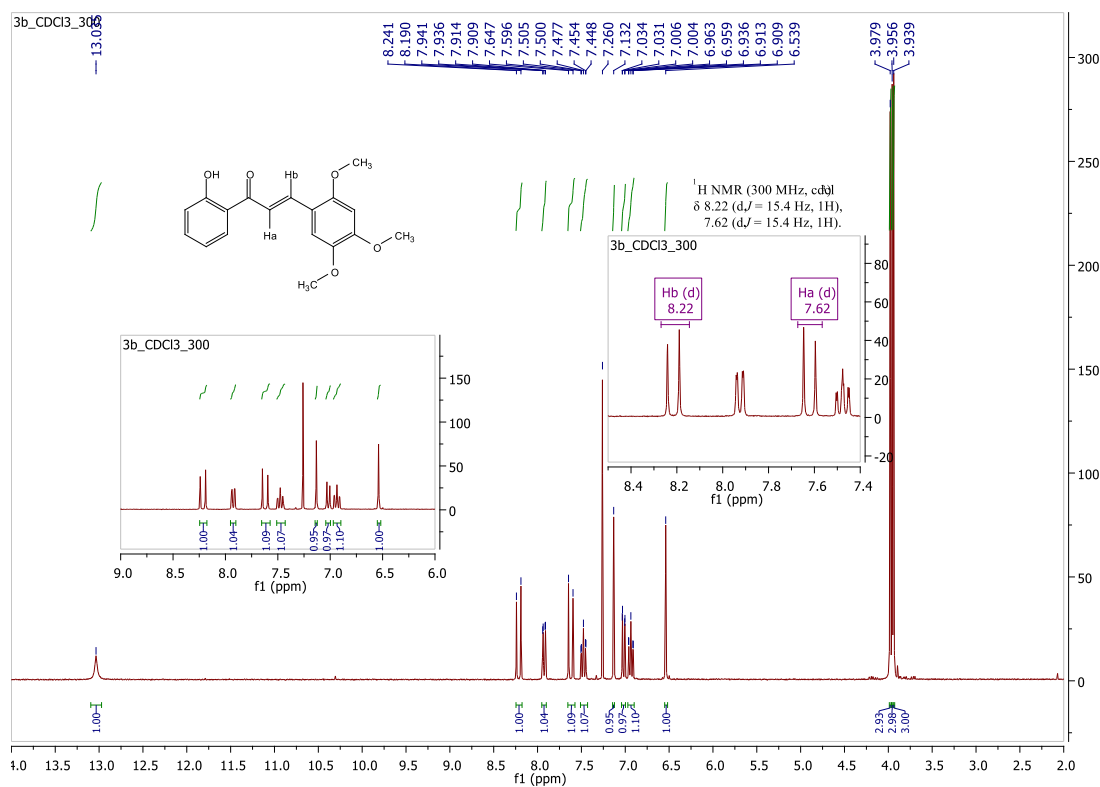

# <sup>1</sup>H NMR of compound **3c**

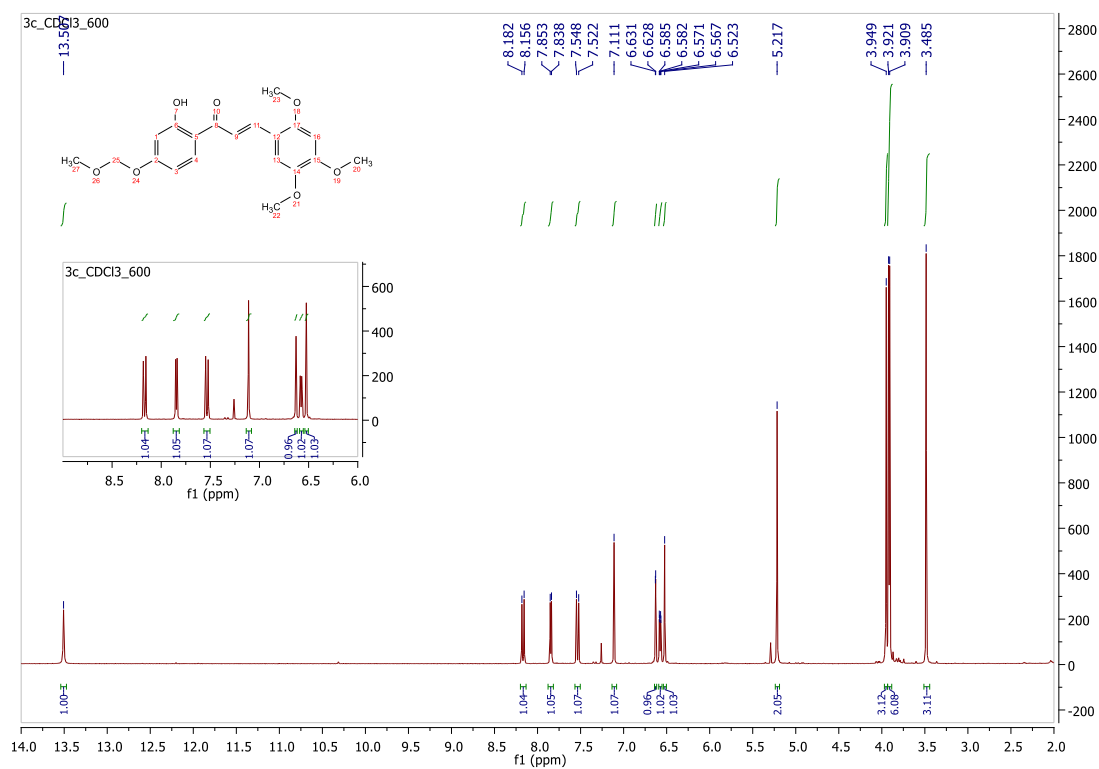

# <sup>13</sup>C NMR of compound **3c**

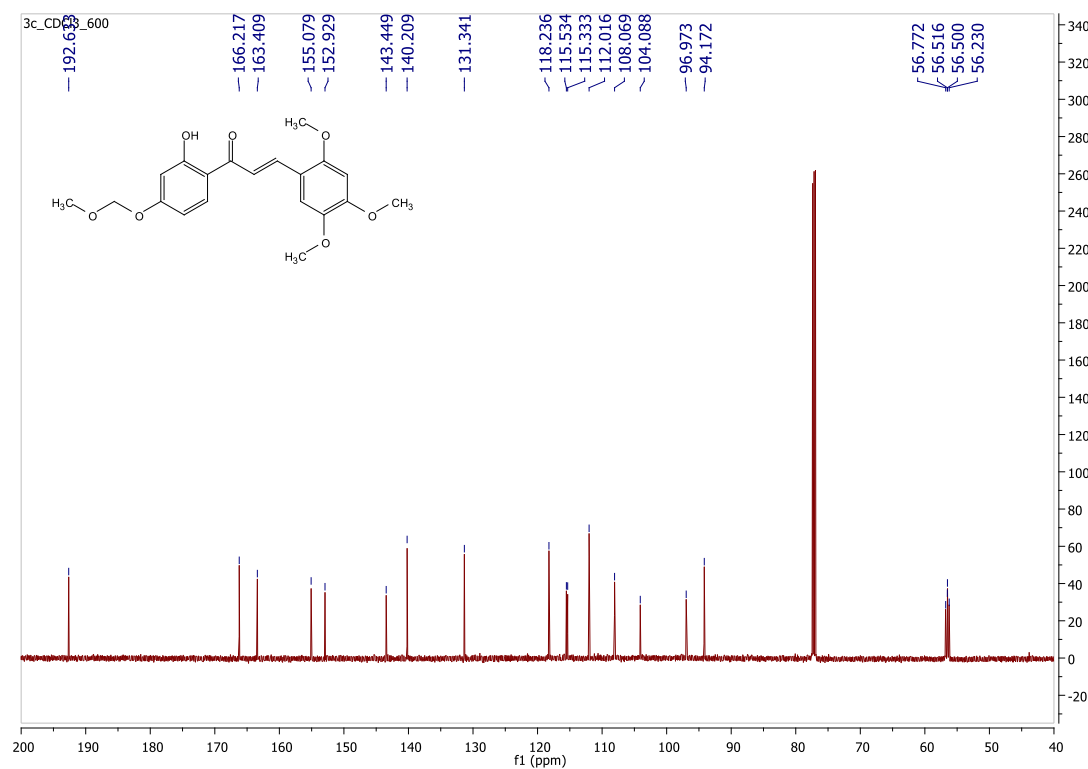

# <sup>1</sup>H NMR of compound **3d**

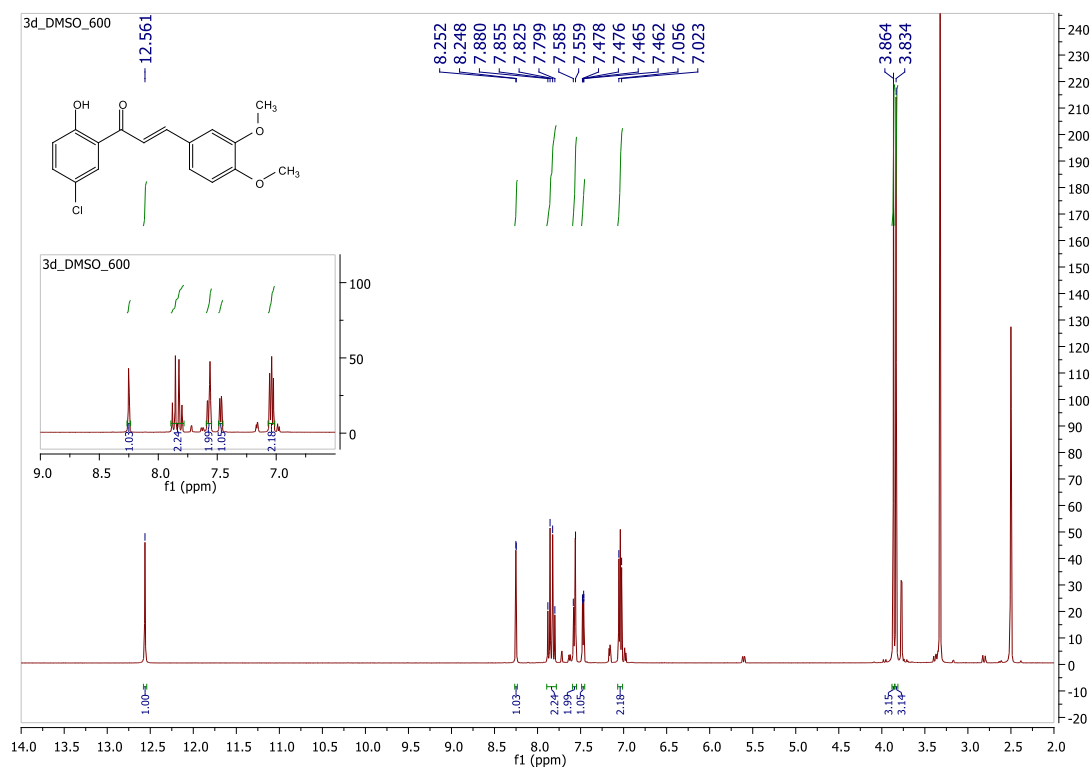

# <sup>1</sup>H NMR of compound **3e**

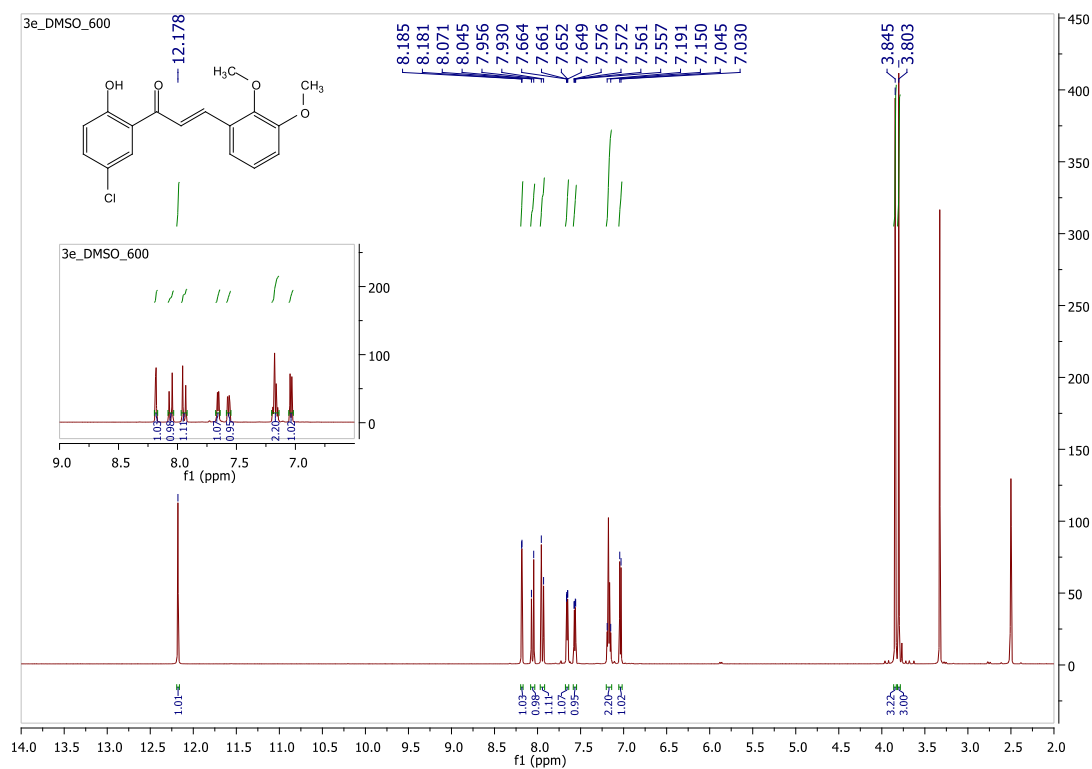

# <sup>1</sup>H NMR of compound **3f**

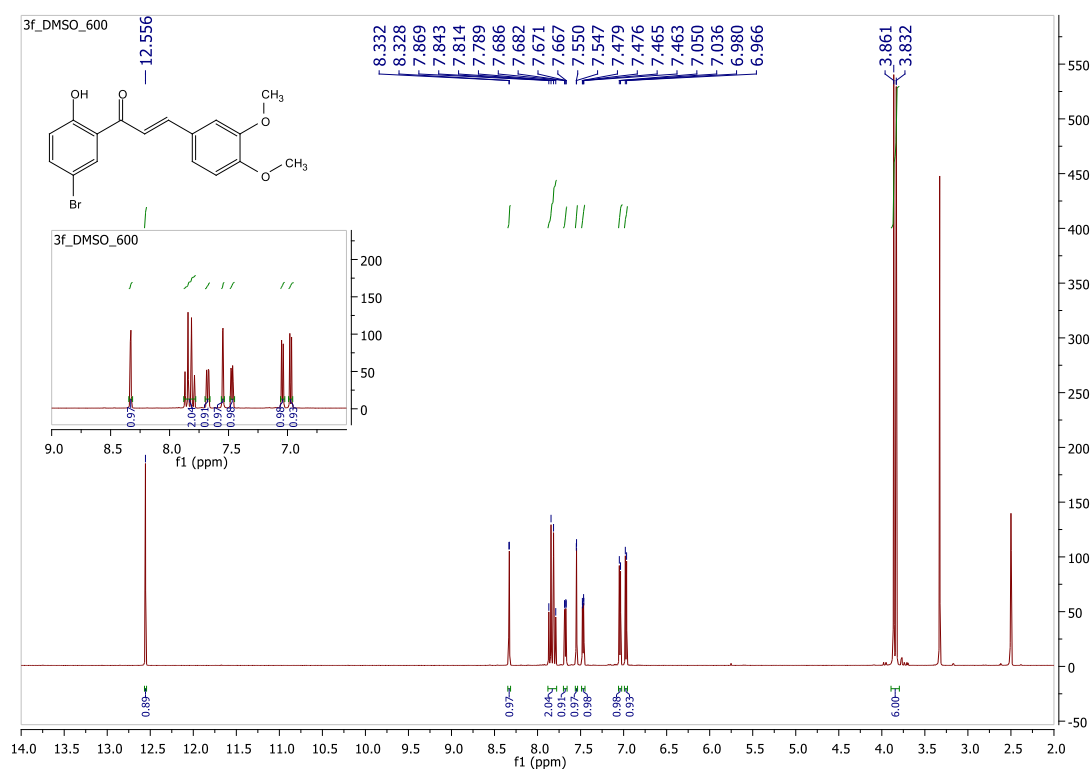

# <sup>1</sup>H NMR of compound **3g**

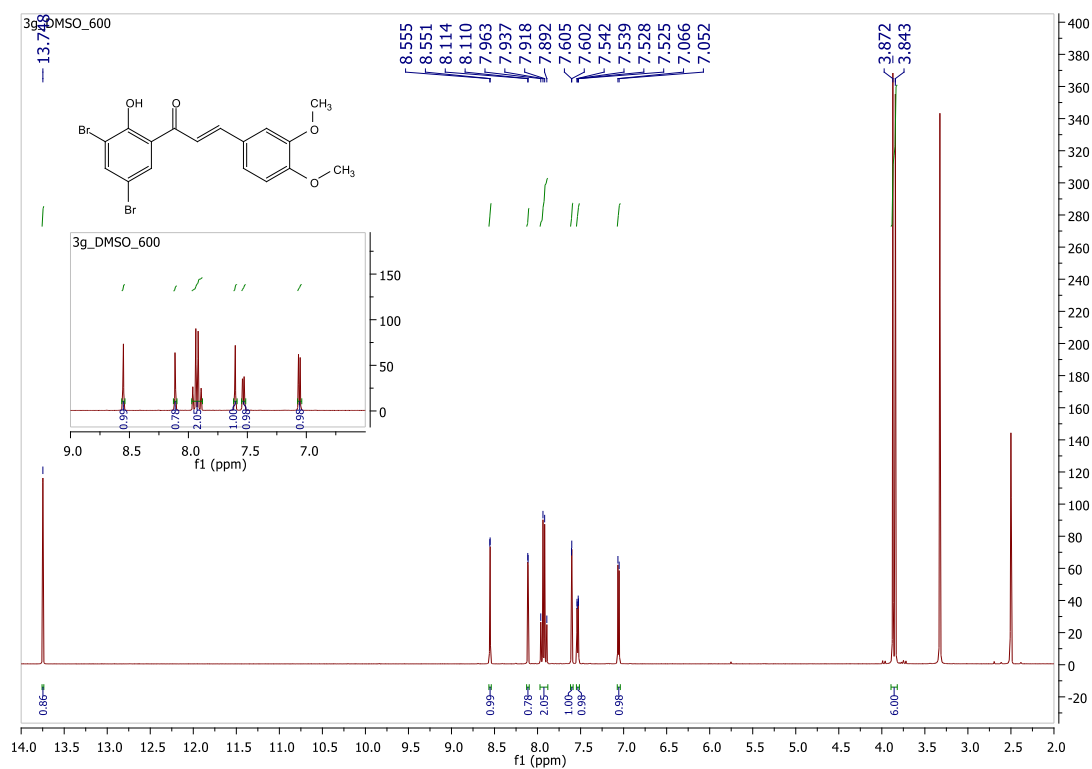

### <sup>1</sup>H NMR of compound **3h**

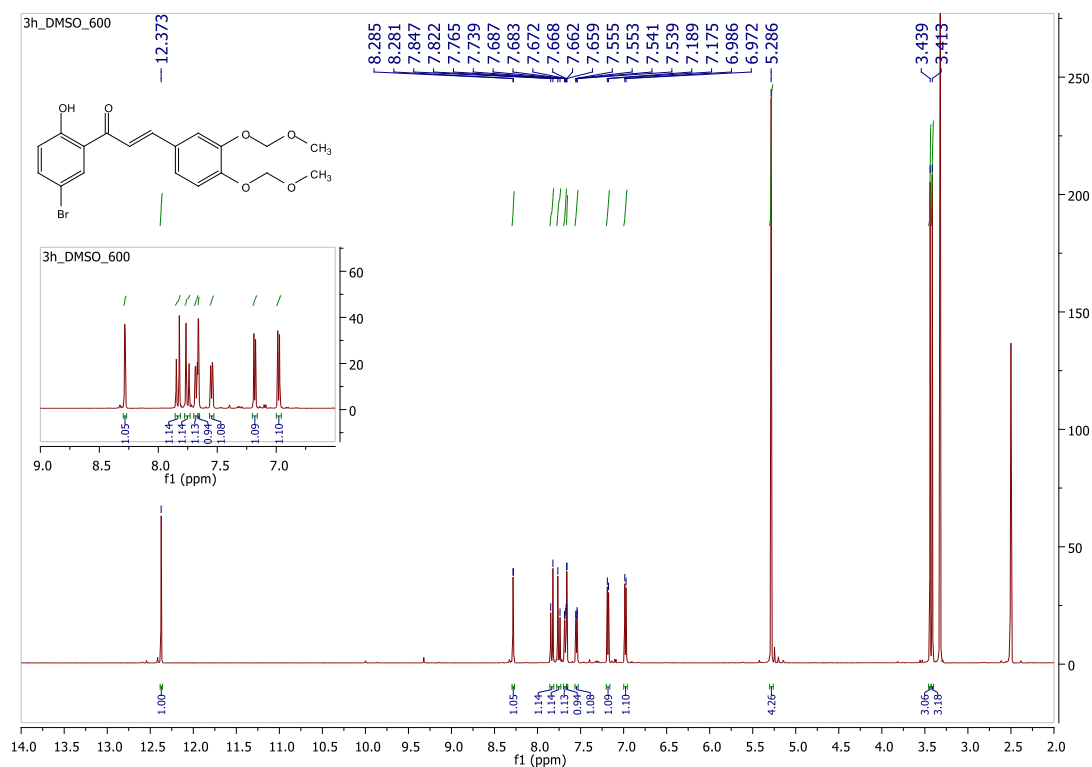

### <sup>13</sup>C NMR of compound **3h**

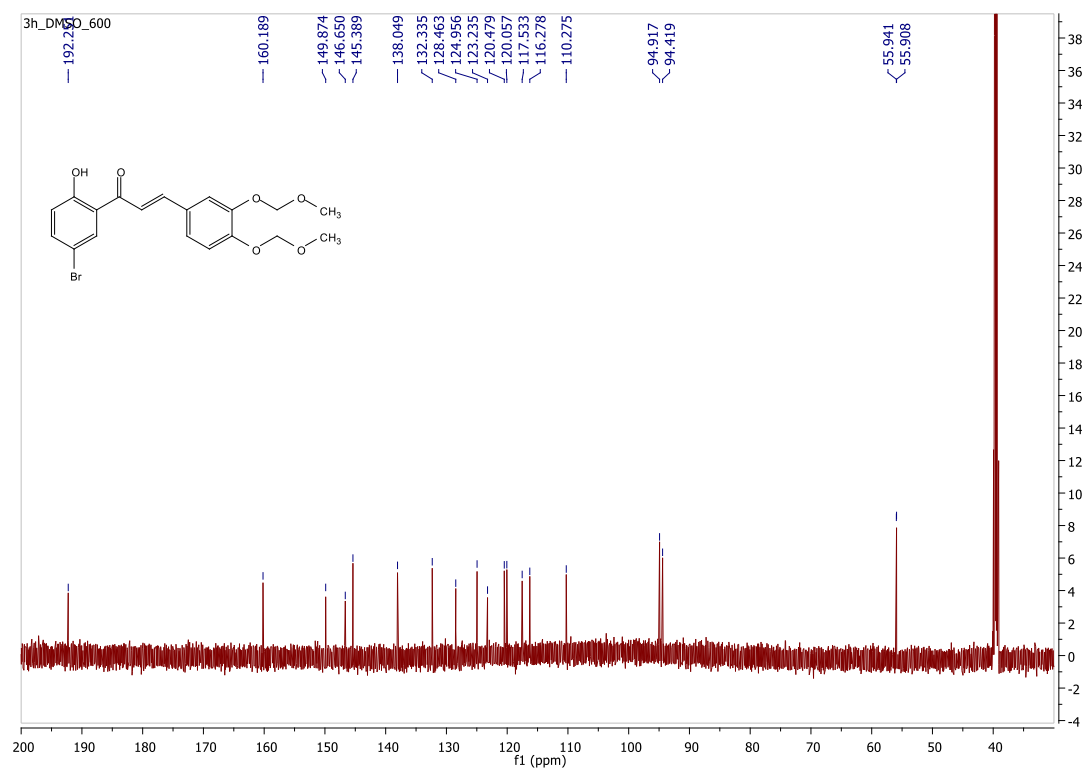



# <sup>1</sup>H NMR of compound **3i**

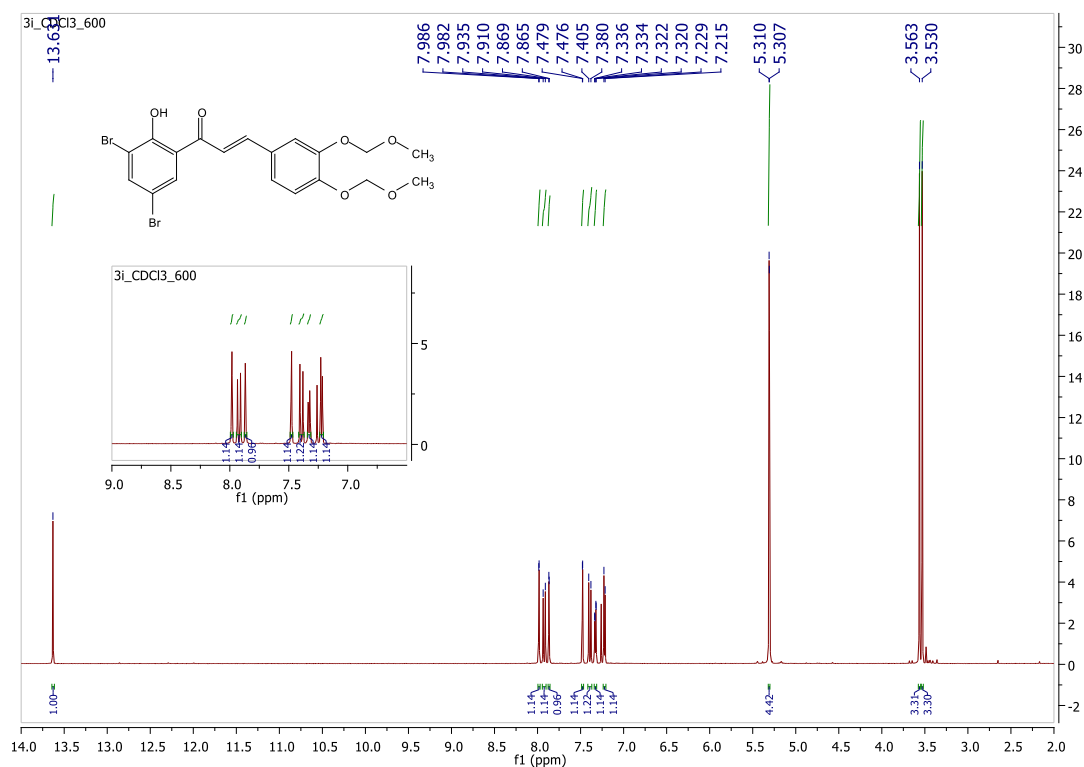

# <sup>1</sup>H NMR of compound **3j**

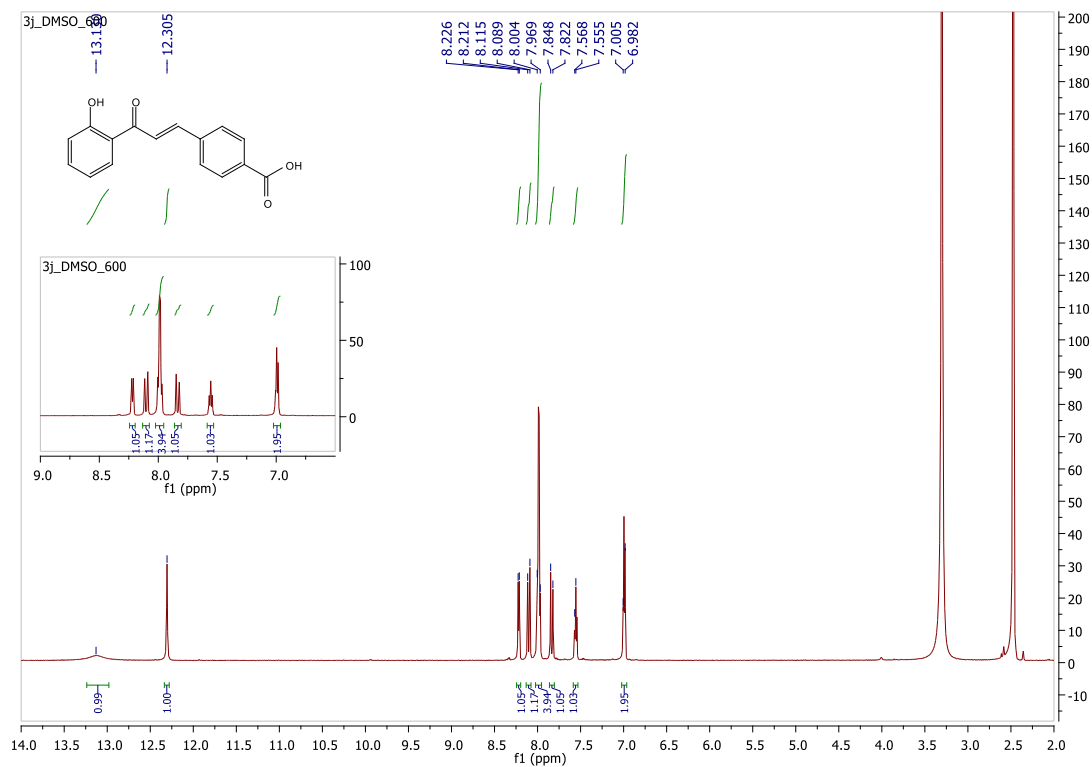

# <sup>1</sup>H NMR of compound **3k**

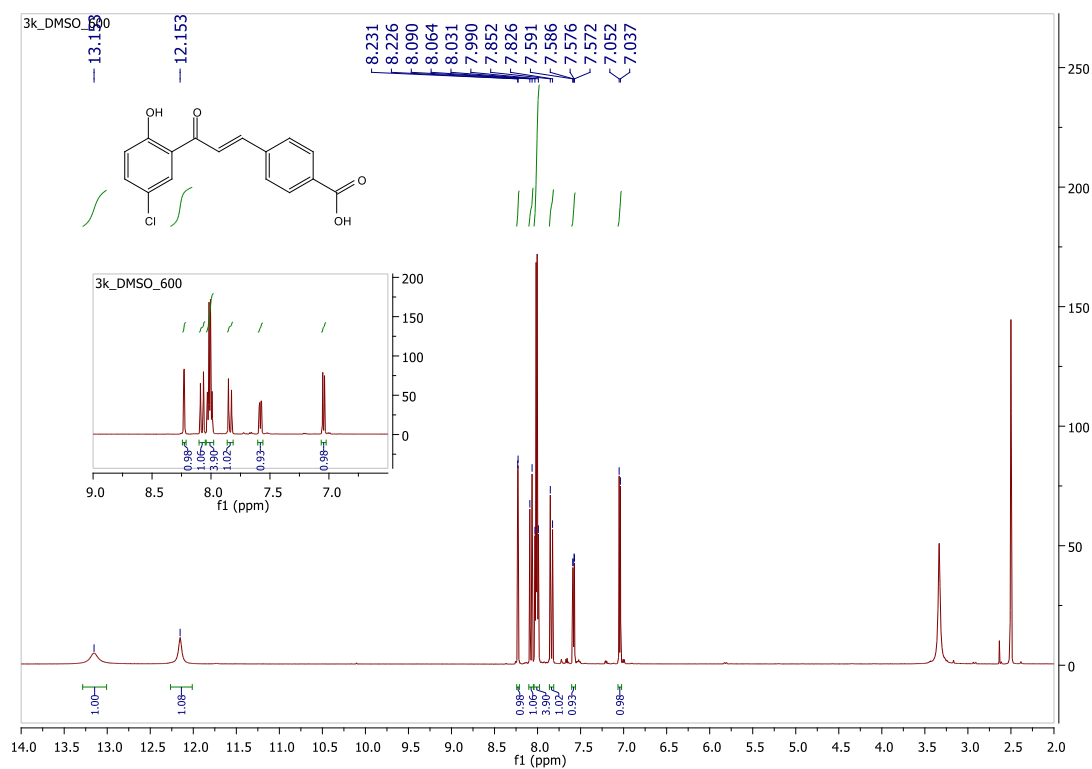

# <sup>1</sup>H NMR of compound **3l**

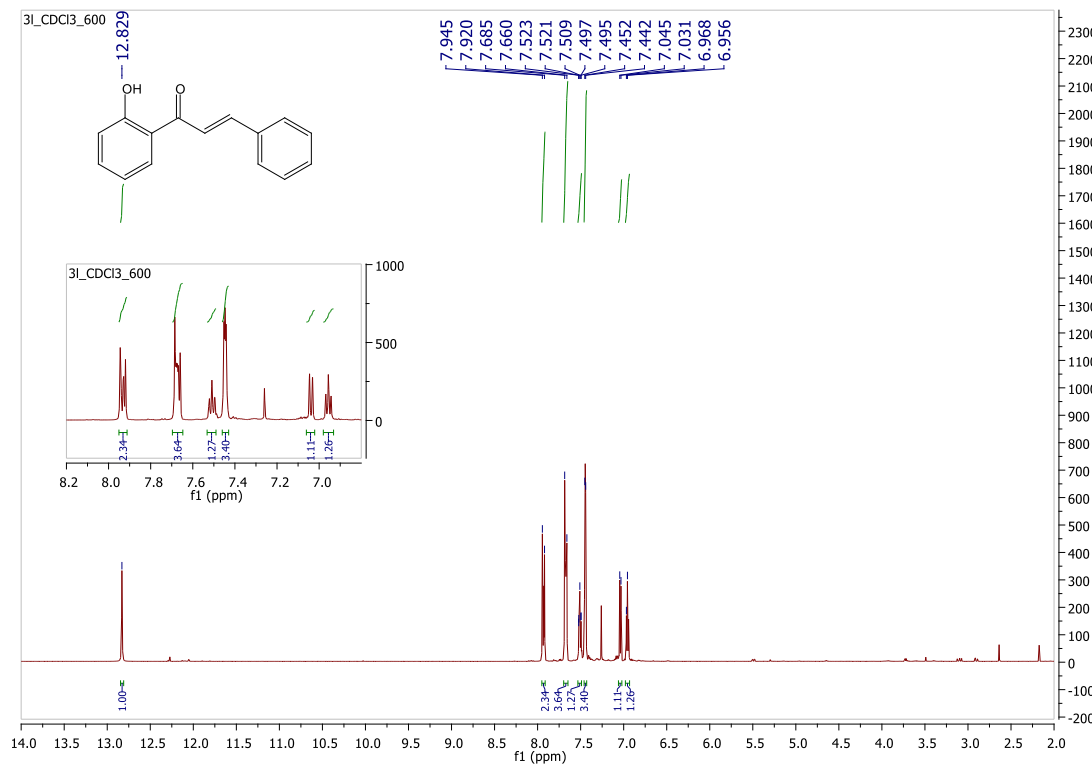

# <sup>1</sup>H NMR of compound **4a**

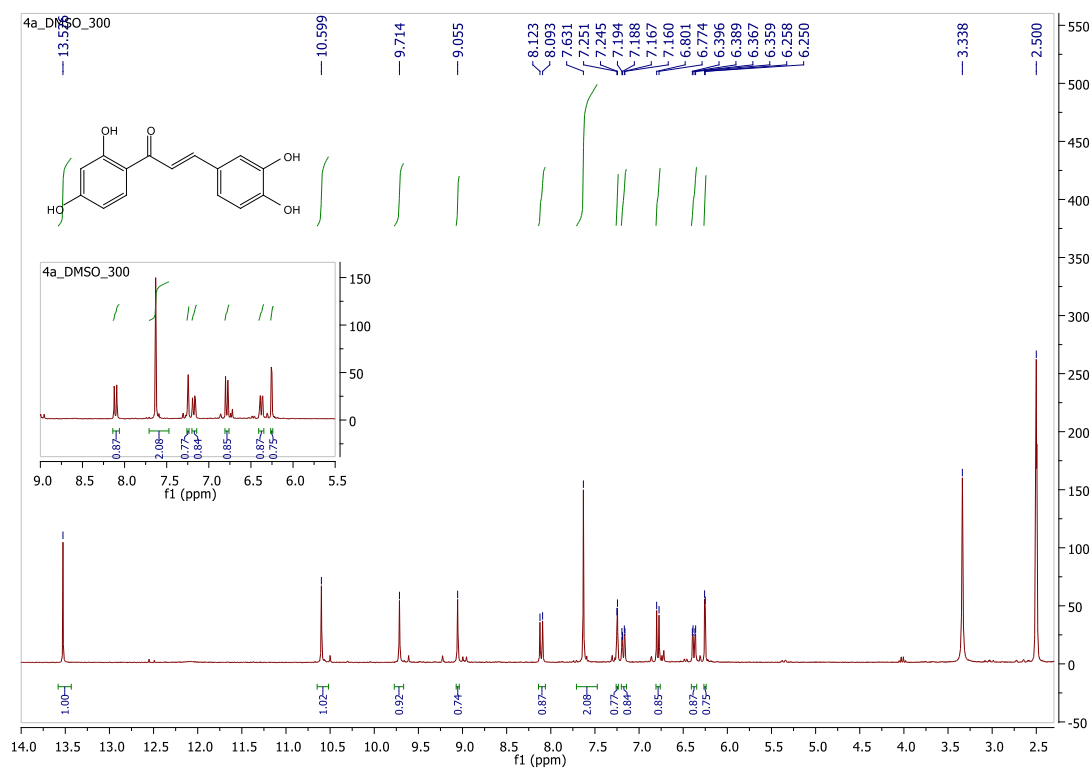

# <sup>1</sup>H NMR of compound **4b**

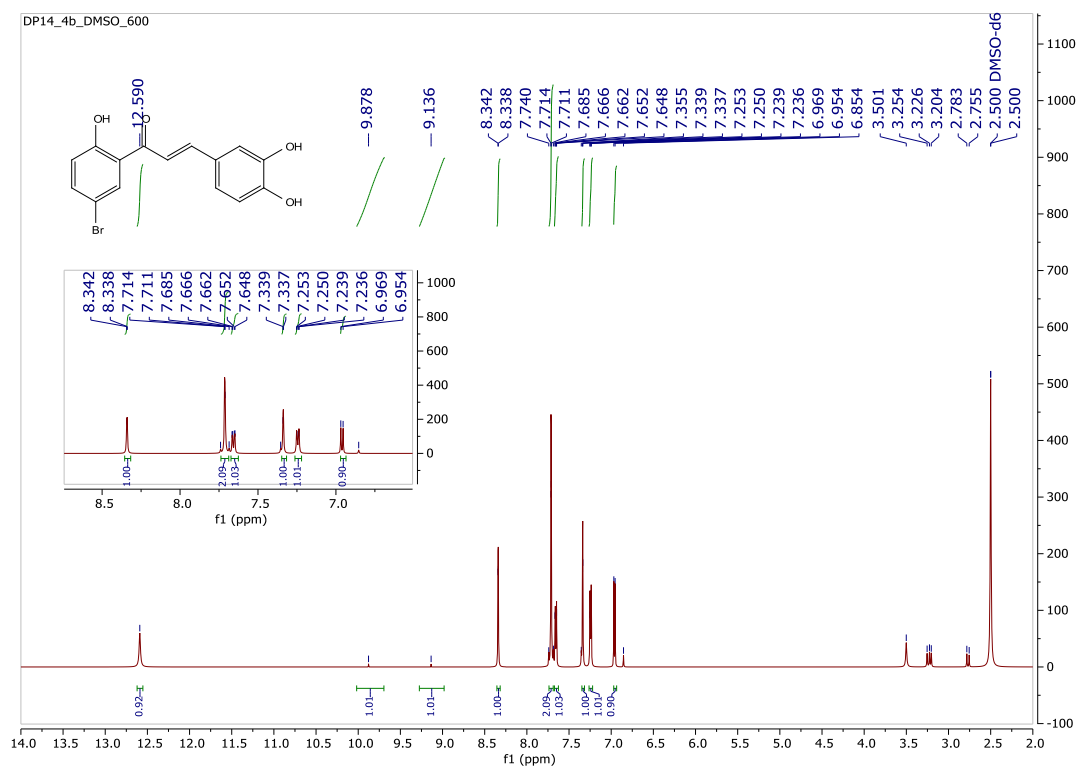

# <sup>13</sup>C NMR of compound **4b**

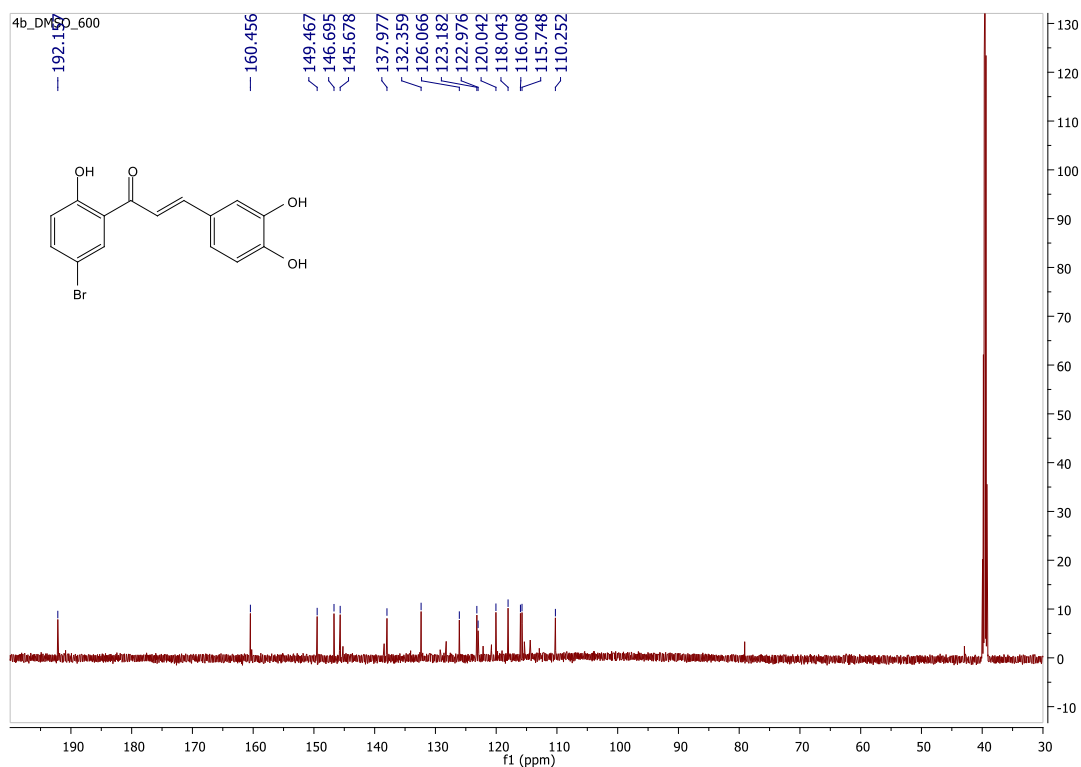

# <sup>1</sup>H NMR of compound **5**

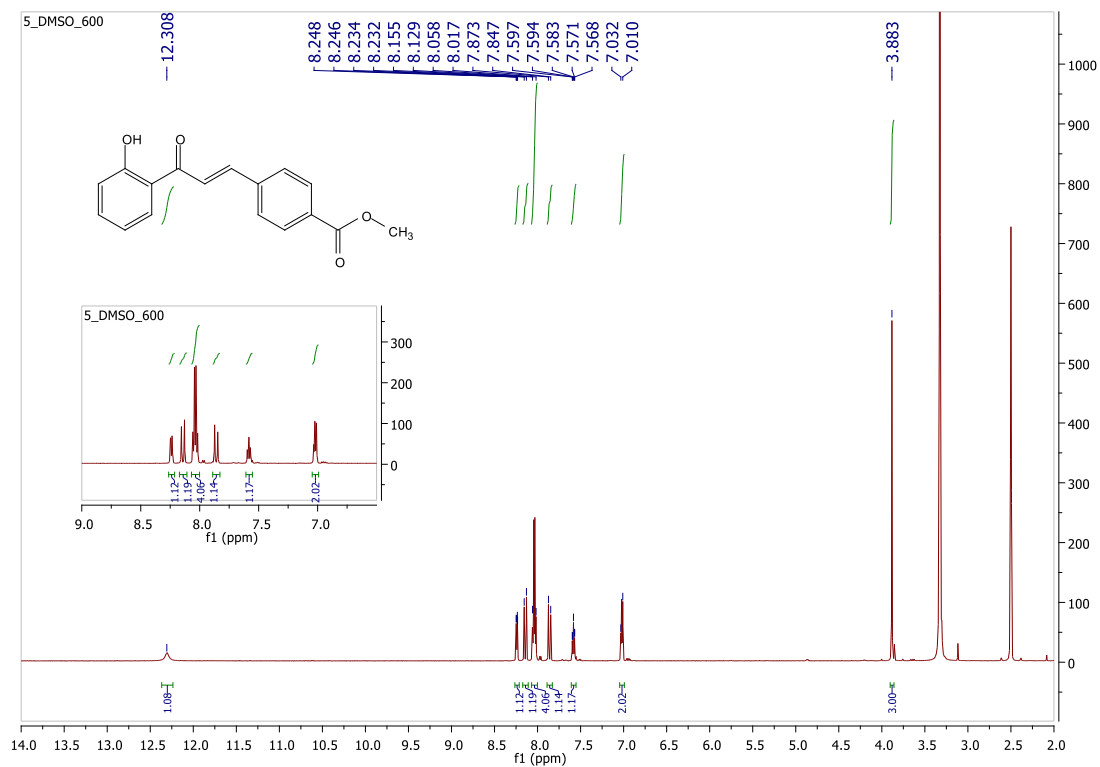

# <sup>13</sup>C NMR of compound **5**

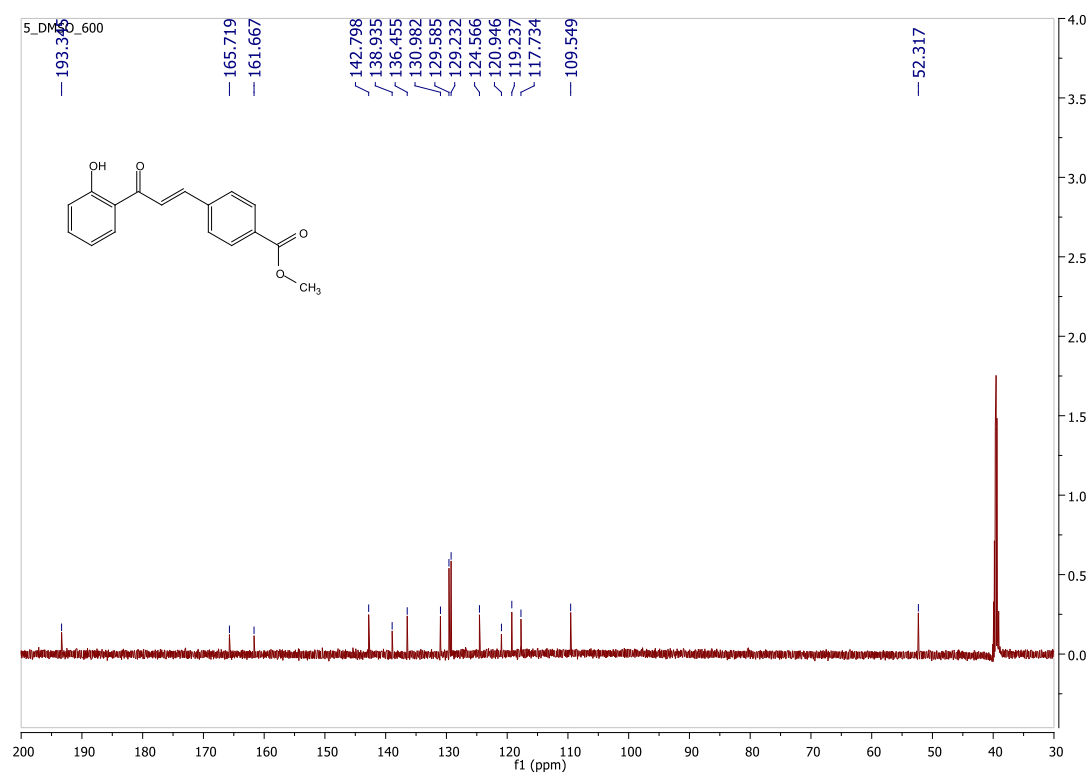

# <sup>1</sup>H NMR of compound **6a**

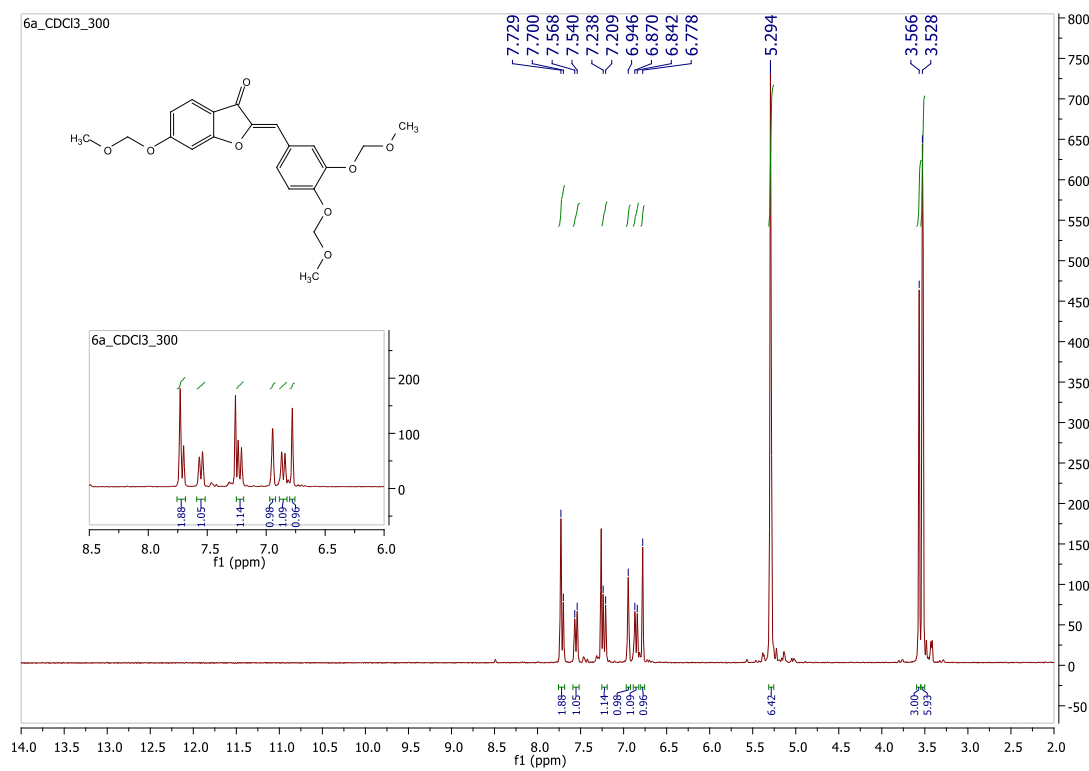

# <sup>13</sup>C NMR of compound **6a**

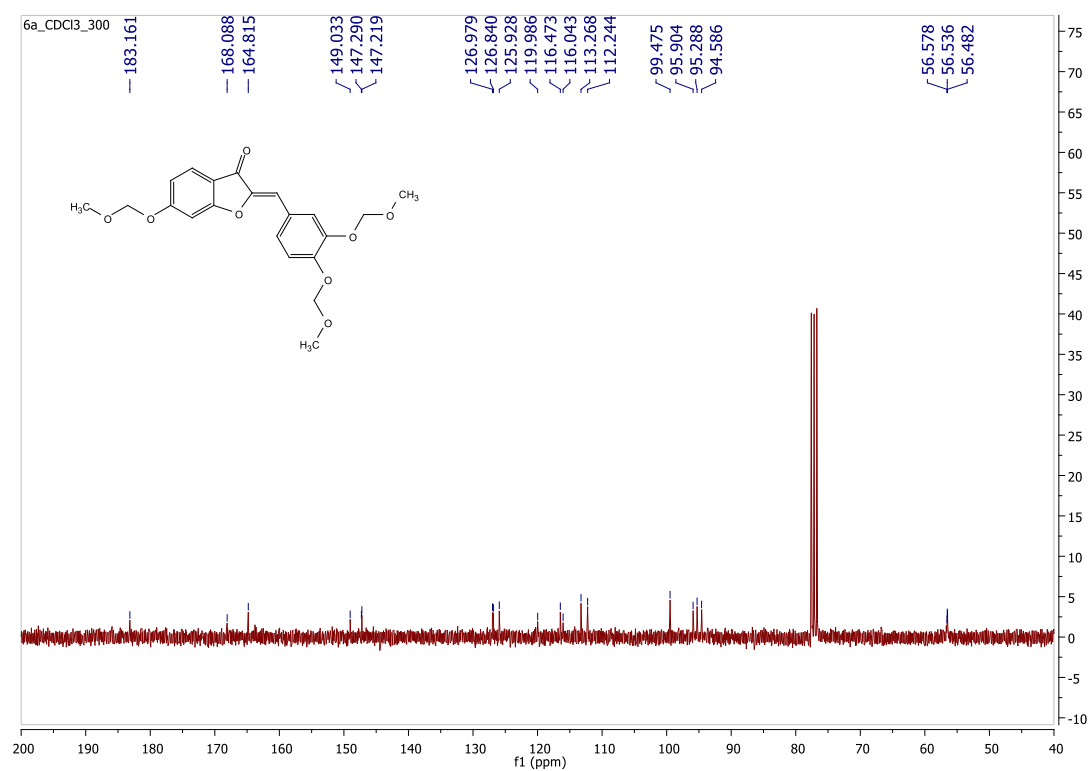

# <sup>1</sup>H NMR of compound **6b**

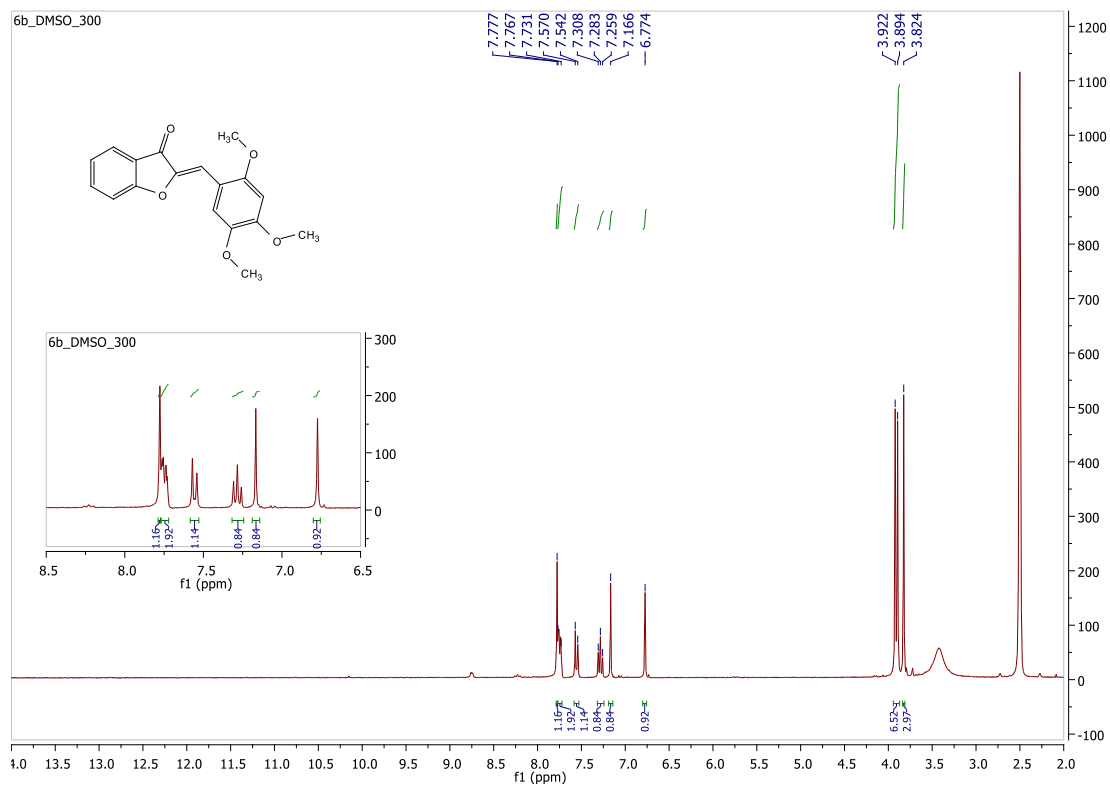

# <sup>1</sup>H NMR of compound **7a**

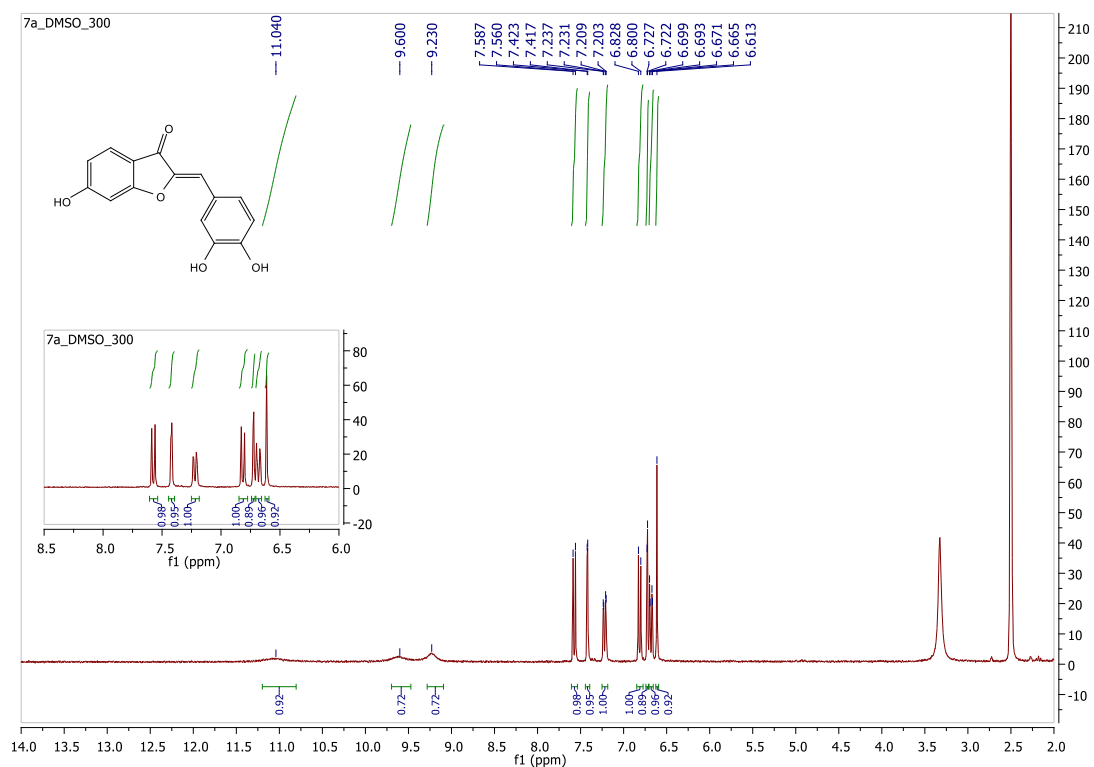

# <sup>1</sup>H NMR of compound **7b**

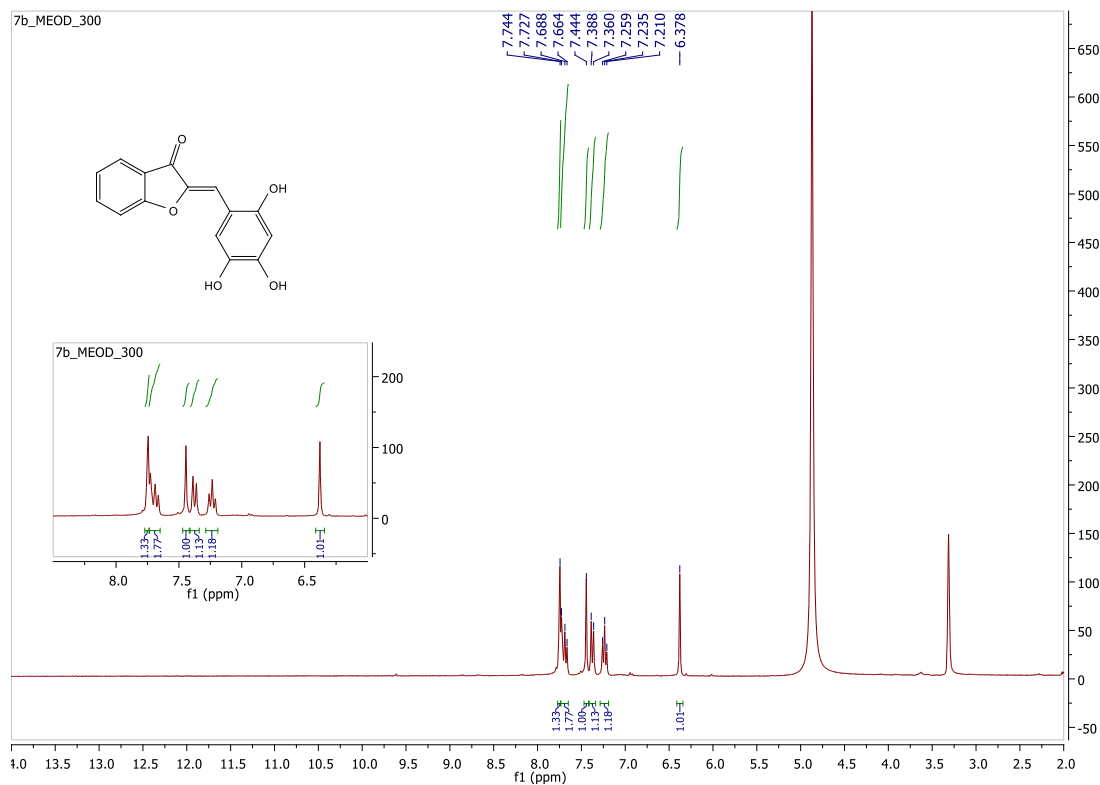

Supplement: s1 [file s1]
